# Supplementary material for: One-step template-directed synthesis of multifunctionalised nanoporous silica: on the way to interactive nanomaterials
Source: Royal Society of Chemistry journal article supplement (doi:10.1039/b417522k), 2005-01-01
Supplement: b417522k.pdf [file b417522k.pdf]

***Preparation of material  $S_{1,SH}^{Au}$***

In a typical experiment, 200 mg of silica  $S_{1,SH}$  was suspended in 10 ml THF and a solution of 3.96 mg AuCl(THT) (SH/Au = 1/0.05) in 5 ml of THF was added. After stirring for 10 h, the solid was filtered, washed with 2x5 ml THF and dried under vacuum at ambient temperature. The solid was suspended in 10 ml of EtOH and a solution of 28 mg NaBH<sub>4</sub> (50 eq. to Au) in 10 ml EtOH was added. After stirring for 8 hours, a orange brown solid was filtered, washed twice by THF and dried under vacuum to give  $S_{1,SH}^{Au}$ .
